# Supplementary material
Source: HighWire-hosted journal article supplement (https://err.ersjournals.com/content/32/169/230029)
Supplement: inline-supplementary-material-1 [file inline-supplementary-material-1.pdf]

## **ONLINE SUPPLEMENTARY MATERIAL**

### **(Standard Operating Procedures for Test Conduct and Test Reporting)**

For detailed instructions for the test set-up, conduct and reporting of cardiopulmonary exercise testing (CPET) with measures of pulmonary gas exchange and ventilation the reader should refer to the European Cystic Fibrosis Society Exercise Work Group Statement on Exercise Testing (1) and the European Respiratory Society Statement on Standardisation for CPET in Chronic Lung Diseases (49).

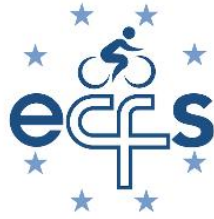

Exercise Working Group

## TEST INSTRUCTIONS

### **$W_{\text{peak}}$ Cycle Ergometer Test**

The peak power ( $W_{\text{peak}}$ ) cycle ergometer test is similar to cardiopulmonary exercise testing, but involves running the protocol without ‘breath-by-breath’ measures of pulmonary gas exchange and ventilation. The  $W_{\text{peak}}$  test is an incremental cycling test (ramp or minute-by-minute stages) that involves the participant maintaining a constant pre-determined cadence (pedal speed) as workload is progressively increased until exhaustion. The primary measurement from the test is  $W_{\text{peak}}$ , alongside other measures of physiology and perceptuals. The following procedures are adapted from the European Respiratory Society (ERS) (49) and European Cystic Fibrosis Society (ECFS) (1) statements.

### **Equipment**

- Calibrated cycle ergometer
- Pulse oximeter to continuously measure oxygen saturation ( $\text{SpO}_2$ , preferably forehead sensor) and heart rate (HR)
- Scales to assess leg effort and breathlessness (e.g., Borg Scale)
- A source of oxygen
- Telephone (in case of emergency)
- Defibrillator (compulsory, depending on the testing location and conditions)
- ECG (optional)
- Supplemental  $\text{O}_2$  (optional)

## **Pre-test preparations**

- Refrain from eating for at least 2 hours before testing
- Participants should not exercise vigorously within 24 hours prior to completing the test
- Comfortable clothing should be worn with appropriate footwear.
- Usual pre-exercise bronchodilator and dose should be administered at least 10 minutes before the test
- Set-up the cycle ergometer to ensure appropriate settings for the participant. For small paediatric participants a paediatric ergometer and/or paediatric pedal cranks / vertical and horizontal saddle adjustments may be required
- The participant should sit in a chair next to the cycle ergometer at the starting position for ~10 minutes prior to the start of the test. During this time, contraindications should be checked, and pre-test measures (e.g., SpO<sub>2</sub>, HR, effort, breathlessness) completed
- Measure symptoms on a standardised scale immediately prior to test commencement
- A warm-up period before the test is not required as the protocol comprised a warm-up
- When possible, effort should be made to familiarise participants with the equipment and what it feels like to cycle at a set cadence whilst workload increases prior to the test. If this cannot be undertaken at a separate visit then rest should be undertaken before the final test then begins.

## **Protocol**

- A resting phase of 3 minutes, seated on the cycle ergometer, before started exercise should be used to collect HR, SpO<sub>2</sub> and ratings of effort and breathlessness. Resting values should be record towards the end of this phase when the participant has been seated in position.
- This is followed by a 3 minute period of unloaded cycling. Most cycle ergometers do not allow 0 W, this should be ~10 W, with this work rate stated in the test report. This value can be obtained from the yearly cycle ergometer calibration report.
- In participants with more severe CF lung disease and / or severe deconditioning, this unloaded phase may be shortened to 2 minutes (49).
- The incremental test begins – aiming for a total duration of the incremental phase of 8-12 minutes. This can be either an incremental ramp test or minute-by-minute stages. Minute-by-minute stages may be preferable in clinical practice where the cycle

ergometer may not be connected to a computer that imposes the work rate and the test must be run manually.

- The choice of work rate depends on a number of factors, such as age, sex, body size, disease severity, pulmonary function, fitness level, etc.
- The increments can be adjusted dependent on fitness levels, e.g.
  - e.g. a fit 80 kg young man may have a target workload of 320 W (4 W/kg), such that a 30W/min ramp or minute-by-minute work rate increment is appropriate, whilst a sedentary 55 kg woman may be expected to have a target workload of 110 W (2 W/kg), suggesting that a 10W ramp should be chosen. For children and adolescents, an equation predicting peak workload has been published (50).
  - Further reductions should be made in advanced lung disease e.g. FEV<sub>1</sub> <40% predicted
- HR and SpO<sub>2</sub> should be monitored throughout exercise and effort and breathlessness ratings recorded at the end of each minute and at end-exercise
- For the measurement of effort and breathless during exercise the following instruction may be useful:

*“During the test, we are going to ask you about the intensity of your breathlessness and leg discomfort at that point in time. As you should avoid speaking during the test, you will use a finger of your hand to point which number between 0 and 10 [amend based on scale being used] best reflects the intensity of each of these sensations”. (49)*
- Upon exhaustion, defined as the point at which the participant can no longer maintain the required cadence despite strong verbal encouragement, or that exhaustion has been reached in the view of the tester, the recovery phase should begin.
- The recovery phase should last 2-3 minutes of cycling at a slow cadence (~ 30 rpm), although a longer recovery may be needed. HR, SpO<sub>2</sub>, effort, breathless and symptoms should continue to be monitored throughout recovery.

## **Outcomes**

- Peak power output ( $W_{\text{peak}}$ ) – average of the final 30 seconds
- Heart rate (ECG if available) at peak exercise
- Continuous SpO<sub>2</sub> and SpO<sub>2</sub> at peak exercise. If SpO<sub>2</sub> drops below 90%, power output and HR at this point should be recorded.
- Subjective perception of breathlessness and effort

## **Prediction equations**

There are numerous different prediction equations for CPET outcomes available (51), but only few report normal reference equations for  $W_{\text{peak}}$  (e.g. (52, 53)). Reference equations for the Godfrey protocol are presented in Hebestreit et al. (2015) (1).

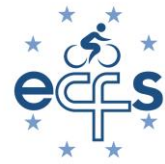

**Test Report –  $W_{\text{peak}}$  Cycle Ergometer Test**

Date of test: \_\_\_\_\_ (dd/mm/yyyy)

Date of birth: \_\_\_\_\_ (dd/mm/yyyy)

First name: \_\_\_\_\_

Last name: \_\_\_\_\_

Indication of test: \_\_\_\_\_

Medications: \_\_\_\_\_

Bronchodilator/time since last dose: \_\_\_\_\_

Oxygen supplementation:  Yes \_\_\_\_\_ (L/min)  No

Unloaded work rate (W): \_\_\_\_\_

Work rate increments used (W/min): \_\_\_\_\_

**Test Results**

Did the participant experience an adverse event?  Yes  No

Yes, please specify:

\_\_\_\_\_

$W_{\text{peak}}$  (W): \_\_\_\_\_ Reason for test termination: \_\_\_\_\_

Incremental phase duration (min): \_\_\_\_\_

**Pre-test**

**Post-test**

Resting heart rate: \_\_\_\_\_ bpm

Peak heart rate: \_\_\_\_\_ bpm

Resting SpO<sub>2</sub>: \_\_\_\_\_ %

SpO<sub>2</sub> at peak exercise: \_\_\_\_\_ %

Comment on SpO<sub>2</sub> signal quality: \_\_\_\_\_

\*Nadir SpO<sub>2</sub>: \_\_\_\_\_ %

*\*Based on continuous SpO<sub>2</sub> measurement*

Resting breathlessness: \_\_\_\_\_

Peak breathlessness: \_\_\_\_\_ [state scale used]

Resting leg effort (RPE): \_\_\_\_\_

Peak leg effort: \_\_\_\_\_ [state scale used]

## Test

| Time (mins) | SpO <sub>2</sub> (%) | HR (bpm) | Dyspnoea (scale used) | Leg effort (scale used) |
|-------------|----------------------|----------|-----------------------|-------------------------|
| Rest        |                      |          |                       |                         |
| Unloaded 1  |                      |          |                       |                         |
| Unloaded 2  |                      |          |                       |                         |
| Unloaded 3  |                      |          |                       |                         |
| 1           |                      |          |                       |                         |
| 2           |                      |          |                       |                         |
| 3           |                      |          |                       |                         |
| 4           |                      |          |                       |                         |
| 5           |                      |          |                       |                         |
| 6           |                      |          |                       |                         |
| 7           |                      |          |                       |                         |
| 8           |                      |          |                       |                         |
| 9           |                      |          |                       |                         |
| 10          |                      |          |                       |                         |
| 11          |                      |          |                       |                         |
| 12          |                      |          |                       |                         |
| 13          |                      |          |                       |                         |
| 14          |                      |          |                       |                         |
| 15          |                      |          |                       |                         |

|            |  |  |  |  |
|------------|--|--|--|--|
| Recovery 1 |  |  |  |  |
| Recovery 2 |  |  |  |  |
| Recovery 3 |  |  |  |  |
| Recovery 4 |  |  |  |  |
| Recovery 5 |  |  |  |  |

**Comments**

---



---



---



---



---



---



---



---

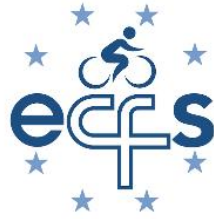

Exercise Working Group

## TEST INSTRUCTIONS

### 6-Minute Walk Test

The 6-minute walk test (6MWT) is a functional exercise capacity test and measures the distance that the participant can walk on a flat surface in 6-minutes. The following procedures are adapted from the European Respiratory Society (ERS) and American Thoracic Society (ATS) technical standards (54).

#### Equipment

- Stopwatch/smartphone
- Mechanical lap counter
- Pulse oximeter to continuously measure oxygen saturation (SpO<sub>2</sub>) and heart rate (HR)
- Two small cones to mark the turnaround points
- Scales to assess leg effort and breathlessness (e.g., Borg Scale)
- Chair(s) along the walking course for the patient to rest if required
- A source of oxygen (for recovery / emergency; O<sub>2</sub> tank optional during the test)
- Telephone (in case of emergency)
- Defibrillator (compulsory, depending on the testing location and conditions)

#### Pre-test preparations

- There is a substantial learning effect when the test is repeated. At least one familiarisation test should be performed (9, 55).
- If two tests are performed on the same day, at least 30 minutes rest should be ensured between tests. Following European Respiratory Society (ERS) and American Thoracic



Society (ATS) technical standards (9), two tests should be performed and the test with the largest walking distance should be recorded.

- Comfortable clothing should be worn with appropriate footwear.
- Usual pre-exercise bronchodilator and dose should be administered at least 10 minutes before the test.
- Participants should not exercise vigorously within 2 hours of completing the test.
- Refrain from eating for at least 1 hour before the test.
- A warm-up period before the test is not required.
- The participant should sit in a chair located at the starting position for ~10 minutes prior to the start of the test. During this time, contraindications should be checked, and pre-test measures (e.g., SpO<sub>2</sub>, heart rate) completed.
- Measure symptoms on a standardised scale immediately prior to test commencement.

### **Test instructions**

- The participant is provided with the following instructions before the start of the test (56):

*“The object of this test is to walk as far as possible in 6 minutes. You will walk along this hallway between the markers, as many times as you can in 6 minutes. I will let you know as each minute goes past, and then at 6 minutes I will ask you to stop where you are. Six minutes is a long time to walk, so you will be exerting yourself. You may get out of breath or become tired. You are permitted to slow down or stop and rest as necessary. If you rest, please resume walking as soon as you are able. You will walk back and forth around the cones. You should pivot briskly around the cones and continue back without stopping. Remember that the object of the test is to walk as far as possible in 6 minutes, but don’t run or jog. Try not to talk during the test unless you have a problem. Do you have any questions? When you start walking, I will start the timer.”*
- During the test, the participant is allowed to have a rest when needed.
- Standardised encouragement should be provided:
  - After the first minute, tell the participant: *“You are doing well. You have 5 minutes to go.”*
  - After the second minute, tell the participant: *“Keep up the good work. You have 4 minutes to go.”*

- After the third minute, tell the participant: *“You are doing well. You have 3 minutes to go.”*
- After the fourth minute, tell the participant: *“Keep up the good work. You have 2 minutes to go.”*
- After the fifth minute, tell the participant: *“You are doing well. You have 1 minutes to go.”*
- With 15 seconds to go, tell the participant: *“In a moment, I am going to tell you to stop. When I do, just stop right where you are.”*
- If the participant stops during the test, ask the participant to resume walking whenever they feel able.
- SpO<sub>2</sub> should be recorded continuously throughout the 6MWT (9).
- If the participant stops to rest during the test, note the time (do not stop the timer). Instruct the participant to continue walking when they feel able.
- The assessor should not pace the participant throughout the 6MWT.
- At the end of the test, record HR, SpO<sub>2</sub>, and subjective perception of breathlessness and leg effort, symptoms and the final distance covered. Ask the participant about their limiting symptom(s).

### **Outcomes**

- Distance (i.e., the larger distance of two tests is recorded)
- Heart rate
- SpO<sub>2</sub> at peak exercise and nadir if continuous measurement available
- Subjective perception of breathlessness and effort

### **Prediction equations**

There is wide variation in the reference values used for 6MWD (9, 32).

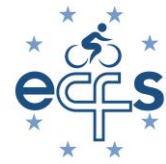

**Test Report – 6-Minute Walk Test**

Date of test: \_\_\_\_\_ (dd/mm/yyyy)

Date of birth: \_\_\_\_\_ (dd/mm/yyyy)

First name: \_\_\_\_\_

Last name: \_\_\_\_\_

Indication of test: \_\_\_\_\_

Medications: \_\_\_\_\_

Bronchodilator/time since last dose: \_\_\_\_\_

Oxygen supplementation:  Yes \_\_\_\_\_ (L/min)  No

Corridor length: \_\_\_\_\_

**Test Results**

Did the participant take a break(s) during the test?  Yes \_\_\_\_\_ sec  No

Yes \_\_\_\_\_ sec

Yes \_\_\_\_\_ sec

Did the participant experience an adverse event?  Yes  No

Yes, please specify:

\_\_\_\_\_

Number of laps: \_\_\_\_\_

Reason for test termination: \_\_\_\_\_

Total distance: \_\_\_\_\_

**Pre-test**

**Post-test**

Resting heart rate: \_\_\_\_\_ bpm

Peak heart rate: \_\_\_\_\_ bpm

Resting SpO<sub>2</sub>: \_\_\_\_\_ %

SpO<sub>2</sub> at peak exercise: \_\_\_\_\_ %

Comment on SpO<sub>2</sub> signal quality: \_\_\_\_\_

\*Nadir SpO<sub>2</sub>: \_\_\_\_\_ %

*\*Based on continuous SpO<sub>2</sub> measurement*

Resting breathlessness: \_\_\_\_\_

Peak breathlessness: \_\_\_\_\_ [state scale used]

Resting leg effort (RPE): \_\_\_\_\_

Peak leg effort: \_\_\_\_\_ [state scale used]

### Test 1

| Time (mins) | SpO <sub>2</sub> (%) | HR (bpm) | Dyspnoea (scale used) | Leg effort (scale used) |
|-------------|----------------------|----------|-----------------------|-------------------------|
| Rest        |                      |          |                       |                         |
| 1           |                      |          |                       |                         |
| 2           |                      |          |                       |                         |
| 3           |                      |          |                       |                         |
| 4           |                      |          |                       |                         |
| 5           |                      |          |                       |                         |
| 6           |                      |          |                       |                         |
| Recovery 1  |                      |          |                       |                         |
| Recovery 2  |                      |          |                       |                         |
| Recovery 3  |                      |          |                       |                         |

### Test 2

| Time (mins) | SpO <sub>2</sub> (%) | HR (bpm) | Dyspnoea (scale used) | Leg effort (scale used) |
|-------------|----------------------|----------|-----------------------|-------------------------|
| Rest        |                      |          |                       |                         |
| 1           |                      |          |                       |                         |
| 2           |                      |          |                       |                         |
| 3           |                      |          |                       |                         |
| 4           |                      |          |                       |                         |
| 5           |                      |          |                       |                         |
| 6           |                      |          |                       |                         |
| Recovery 1  |                      |          |                       |                         |
| Recovery 2  |                      |          |                       |                         |
| Recovery 3  |                      |          |                       |                         |

|                                            |
|--------------------------------------------|
| <b>Comments</b><br><hr/> <hr/> <hr/> <hr/> |
|--------------------------------------------|

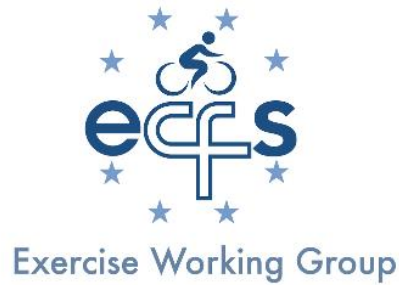

## **TEST INSTRUCTIONS**

### **10 m Modified Shuttle Test**

The 10 m Modified Shuttle Test (10 m MST) is an incremental exercise capacity test and measures the distance that the participant can walk or run on a flat surface. The 10 m MST is available in 15- and 25-level versions where the speed is controlled by a series of pre-recorded signals. Speed increases until the participant can no longer continue. The following procedures are adapted from the European Respiratory Society (ERS) and American Thoracic Society (ATS) technical standards.

### **Equipment**

- Tape measure
- 10 m markers
- Test scoring sheet
- Stopwatch/smartphone
- Pulse oximeter to measure oxygen saturation (SpO<sub>2</sub>) and heart rate
- Scales to assess leg effort and dyspnoea (e.g., Borg Scale, Dalhousie Scale)
- Telephone (in case of emergency)
- Defibrillator (compulsory, depending on the testing location and conditions)

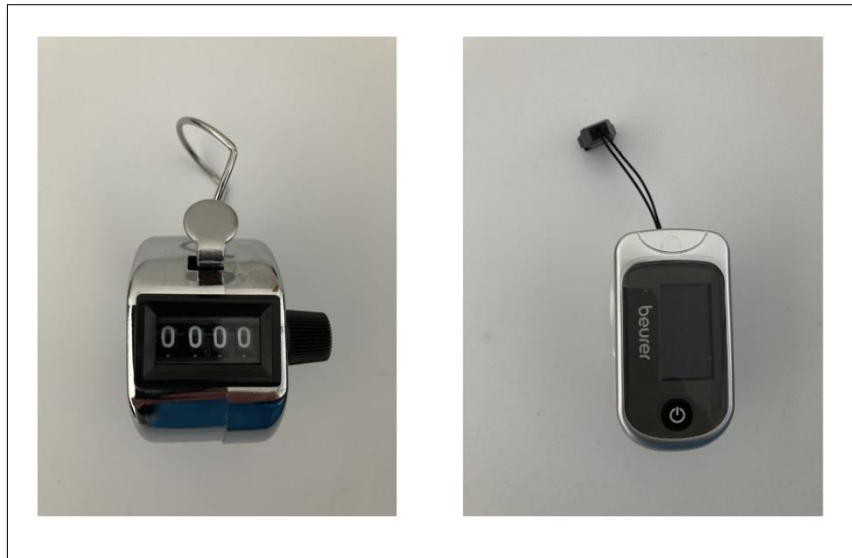

- The MST takes approximately 30 minutes to complete (including preparation and participant recovery time). In centres where this test is not established and/or where the participant is naïve to the test, a practice test is likely to be necessary, and thus the time required for testing, at least initially, may be considerably longer.
- Only standardised instructions from the CD should be used. In contrast to the six-minute walking test, no encouragement should be given throughout the MST.
- A comfortable ambient temperature and humidity should be maintained for all tests.
- The testing track must be the same for all tests for a participant:
  - Cones are placed nine metres apart.
  - The distance covered around the cones is 10 m.

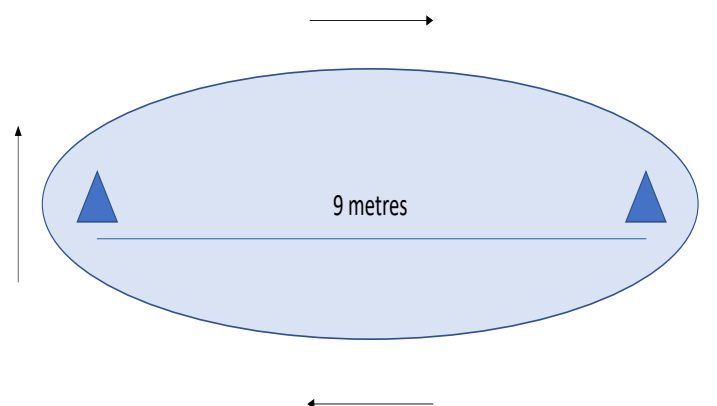

## Pre-test preparations

- Instruct the participant to dress comfortably and to wear appropriate footwear.
- Any prescribed inhaled bronchodilator medication should be taken within one hour of testing or when the participant arrives for testing.
- The participant should rest for at least 15 minutes before beginning the MST.
- Record:
  - Blood pressure
  - Heart rate
  - SpO<sub>2</sub>Dyspnoea score\*  
*\* Note: Show the patient the dyspnoea scale and give standardised instructions on how to obtain a score*

## During the test

The participant is given the following instructions

- *The object of the progressive shuttle test is to walk or run as necessary, for as long as possible, there and back along the 10 m course, keeping to the speed indicated by the beeps on the audio recording.*
- *You will hear these beeps at regular intervals.*
- *You should walk or run at a steady pace, aiming to turn around the cone at one end of the course when you hear the first beep, and at the other end when you hear the next.*
- *The speed for the first minute is very slow. You have 20 seconds to complete each 10 m shuttle, so don't go too fast.*
- *At first you will be able to walk, but as the beeps get closer together you will need to speed up at the end of each minute.*
- *Your aim should be to follow the set rhythm for as long as you can.*
- *Each single beep signals the end of a shuttle and each triple beep signals an increase in speed.*
- *You should stop the test only when you become too breathless to maintain the required speed or can no longer keep up with the set pace, e.g. you can't run any faster.*
- *The test is progressive. In other words, it is easier at the start and harder at the end.*
- *The test will start in 15 seconds, so get ready at the start now. Level one starts with a triple beep after the 4 second countdown.*

Each minute, record heart rate, SpO<sub>2</sub> and dyspnoea, as well as number of shuttle that is completed as on the recording sheet.

Monitor the participant for untoward signs and symptoms.

### ***Ending the test***

The test ends if any one of the following occur:

- The participant is **more than** 0.5 m away from the cone when the beep sounds (allow one lap to catch up).
- The participant reports that they are too breathless to continue.
- The participant exhibits any of the following signs and symptoms:
  - Chest pain that is suspicious of / for angina.
  - Evolving mental confusion or lack of coordination.
  - Evolving light-headedness.
  - Intolerable dyspnoea.
  - Leg cramps or extreme leg muscle effort
  - Any other clinically warranted reason.

### **At the end of the test**

- Seat the participant or, if the participant prefers, allow to them to stand.
- Immediately record oxygen saturation (SpO<sub>2</sub>), heart rate, dyspnoea and leg effort ratings.
- Two minutes later, record SpO<sub>2</sub> and heart rate to assess the recovery rate.
- Record the total number of shuttles.
- Record the reason for terminating the test. The participant can be asked: “*What do you think stopped you from keeping up with the beeps?*”
- The participant should remain in a clinical area for at least 15 minutes following an uncomplicated test.

### **Learning effects**

There is a small but statistically significant difference between two incremental shuttle tests performed (mean differences of 20 m and 25 m for tests performed on the same day, and 23.5 m for tests performed on different days) (57, 58). This learning effect is considered to be clinically important when evaluating change over time. However, conducting 2 shuttle tests to maximal volitional capacity would be challenging for the participant and any repeat tests are usually done to evaluate the benefits of an intervention such as a course of treatment or the effectiveness of a training program.



## Reference values

Reference equations to predict distance achieved on the MST-15 are available – see below. There are, as yet, no reference equation data for predicting performance on the MST-25.

$$\text{Predicted distance on MST} = 1449.701 - (11.735 \times \text{age}) + (241.897 \times \text{gender}) - (5.686 \times \text{BMI})$$

Where male gender = 1, female gender = 0.

(59-61)

The table below provides information on levels and distances covered within MST-25 and MST-25 protocols:

### Metrics of the 15-level and 25-level Modified Shuttle Tests:

| Level | Shuttle time (s) | Total distance covered (m) |
|-------|------------------|----------------------------|
| 1     | 20.00            | 30                         |
| 2     | 15.00            | 70                         |
| 3     | 12.00            | 120                        |
| 4     | 10.00            | 180                        |
| 5     | 8.57             | 250                        |
| 6     | 7.50             | 330                        |
| 7     | 6.67             | 420                        |
| 8     | 6.00             | 520                        |
| 9     | 5.46             | 630                        |
| 10    | 5.00             | 750                        |
| 11    | 4.62             | 880                        |
| 12    | 4.29             | 1,020                      |
| 13    | 4.00             | 1,170                      |
| 14    | 3.75             | 1,330                      |
| 15    | 3.53             | 1,500                      |
| 16    | 3.33             | 1,680                      |
| 17    | 3.16             | 1,870                      |
| 18    | 3.00             | 2,070                      |
| 19    | 2.86             | 2,280                      |
| 20    | 2.73             | 2,500                      |
| 21    | 2.61             | 2,730                      |
| 22    | 2.50             | 2,970                      |
| 23    | 2.40             | 3,200                      |
| 24    | 2.31             | 3,480                      |
| 25    | 2.22             | 3,750                      |

**Test Report – 10 m Modified Shuttle Test**

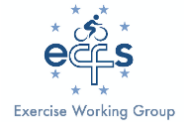

Date of test: \_\_\_\_\_ (dd/mm/yyyy)      Date of birth: \_\_\_\_\_  
(dd/mm/yyyy)

First name: \_\_\_\_\_ Last name: \_\_\_\_\_

Indication of test: \_\_\_\_\_

Oxygen supplementation:  Yes \_\_\_\_\_ (L)  No

**Test Results**

Did the participant take a break during the test?       Yes \_\_\_\_\_ sec       No

Did the participant experience an adverse event?       Yes       No

Yes, please specify:

\_\_\_\_\_  
\_\_\_\_\_

Number of completed shuttles: \_\_\_\_\_ Reason for test termination: \_\_\_\_\_

**Pre-test**

**Post-test**

Resting heart rate: \_\_\_\_\_ bpm

Peak heart rate: \_\_\_\_\_ bpm

Resting SpO<sub>2</sub>: \_\_\_\_\_ %

SpO<sub>2</sub> at peak exercise: \_\_\_\_\_ %

Comment on SpO<sub>2</sub> signal quality: \_\_\_\_\_

\*Nadir SpO<sub>2</sub>: \_\_\_\_\_ %

*\*Based on continuous SpO<sub>2</sub> measurement*

Resting breathlessness: \_\_\_\_\_

Peak breathlessness: \_\_\_\_\_ [state scale used]

Resting leg effort (RPE): \_\_\_\_\_

Peak leg effort: \_\_\_\_\_ [state scale used]

**Comments**

\_\_\_\_\_  
\_\_\_\_\_  
\_\_\_\_\_  
\_\_\_\_\_



| Level | Shuttle time | Shuttle number |    |    |    |    |    |    |   |   |    |    |    |    |    |    |    |    |    |    |    | Distance |
|-------|--------------|----------------|----|----|----|----|----|----|---|---|----|----|----|----|----|----|----|----|----|----|----|----------|
| 19    | 2.86         | 1              | 2  | 3  | 4  | 5  | 6  | 7  | 8 | 9 | 10 | 11 | 12 | 13 | 14 | 15 | 16 | 17 | 18 | 19 | 20 | 2280     |
|       |              | 21             |    |    |    |    |    |    |   |   |    |    |    |    |    |    |    |    |    |    |    |          |
| 20    | 2.73         | 1              | 2  | 3  | 4  | 5  | 6  | 7  | 8 | 9 | 10 | 11 | 12 | 13 | 14 | 15 | 16 | 17 | 18 | 19 | 20 | 2500     |
|       |              | 21             | 22 |    |    |    |    |    |   |   |    |    |    |    |    |    |    |    |    |    |    |          |
| 21    | 2.61         | 1              | 2  | 3  | 4  | 5  | 6  | 7  | 8 | 9 | 10 | 11 | 12 | 13 | 14 | 15 | 16 | 17 | 18 | 19 | 20 | 2730     |
|       |              | 21             | 22 | 23 |    |    |    |    |   |   |    |    |    |    |    |    |    |    |    |    |    |          |
| 22    | 2.50         | 1              | 2  | 3  | 4  | 5  | 6  | 7  | 8 | 9 | 10 | 11 | 12 | 13 | 14 | 15 | 16 | 17 | 18 | 19 | 20 | 2970     |
|       |              | 21             | 22 | 23 | 24 |    |    |    |   |   |    |    |    |    |    |    |    |    |    |    |    |          |
| 23    | 2.40         | 1              | 2  | 3  | 4  | 5  | 6  | 7  | 8 | 9 | 10 | 11 | 12 | 13 | 14 | 15 | 16 | 17 | 18 | 19 | 20 | 3200     |
|       |              | 21             | 22 | 23 | 24 | 25 |    |    |   |   |    |    |    |    |    |    |    |    |    |    |    |          |
| 24    | 2.31         | 1              | 2  | 3  | 4  | 5  | 6  | 7  | 8 | 9 | 10 | 11 | 12 | 13 | 14 | 15 | 16 | 17 | 18 | 19 | 20 | 3480     |
|       |              | 21             | 22 | 23 | 24 | 25 | 26 |    |   |   |    |    |    |    |    |    |    |    |    |    |    |          |
| 25    | 2.22         | 1              | 2  | 3  | 4  | 5  | 6  | 7  | 8 | 9 | 10 | 11 | 12 | 13 | 14 | 15 | 16 | 17 | 18 | 19 | 20 | 3750     |
|       |              | 21             | 22 | 23 | 24 | 25 | 26 | 27 |   |   |    |    |    |    |    |    |    |    |    |    |    |          |

## TEST INSTRUCTIONS

### 1-minute Sit-to-Stand Test

The 1-minute sit-to-stand test (1-min STS) is a functional exercise capacity test and measures the maximum number of sit-to-stand repetitions that a person can perform for one minute.

#### Equipment

- Height adjustable chair
- Tape measure
- Stopwatch/Smartphone
- Counter (compulsory)
- Pulse oximeter to measure oxygen saturation (SpO<sub>2</sub>) and heart rate
- Scales to assess effort and breathlessness (e.g., Borg Scale, Dalhousie Scale)
- Telephone (in case of emergency)
- Defibrillator (compulsory, depending on the testing location and conditions)

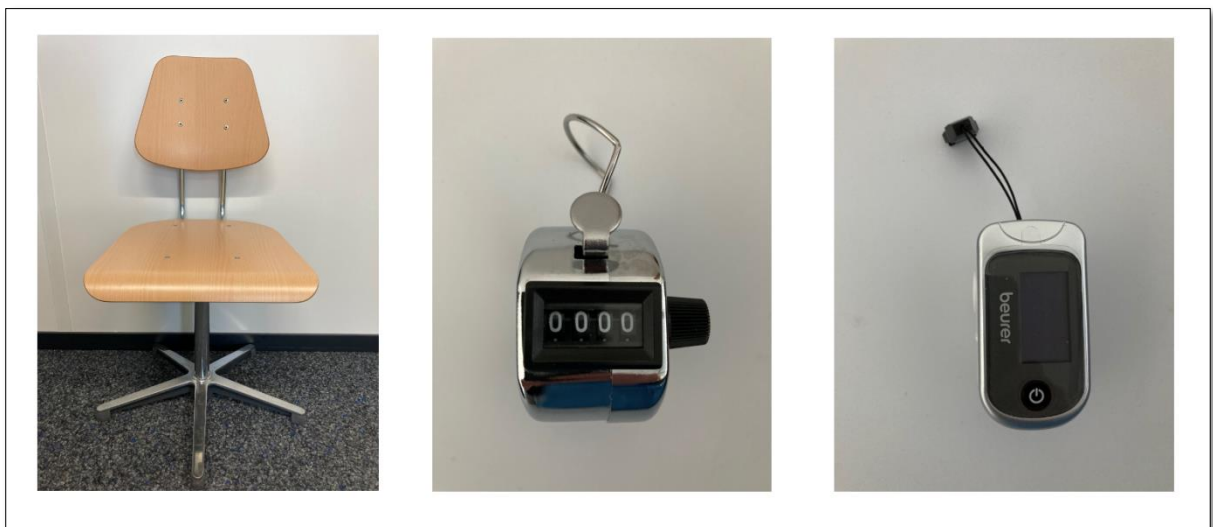

## Pre-test preparations

- Place the chair against the wall for safety reasons.
- Adjust the seat height to have approximately 90° knee angle flexion (see picture). Do not test young children with a standard chair (46-48 cm). Where possible, an adjustable chair that allows for 90° knee angle flexion should be used.

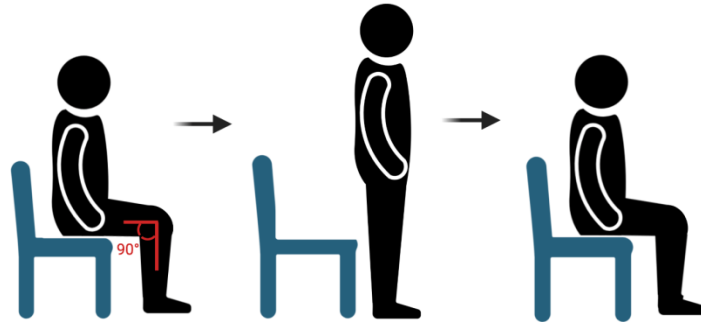

## Test instructions

- Start position: Participants sitting on a chair.
- The participant is provided with the following instructions: *"The objective of this tests is to stand up and sit down on a chair as often as possible in one minute. Put your legs hip-width apart and your feet flat on the floor under your knees so that there is an angle of about 90 degrees. Place your hands on your hips. Now try to stand up and sit down as many times as possible within one minute. Do not use your hands or arms to assist movement. When sitting down you must touch the chair with your buttocks and when standing up your knees must be fully straight. You may get out of breath or become tired. You are permitted to slow down or stop and rest as necessary. After "Ready, set, go" you can start. I will tell you when you have 15 seconds left. If I speak to you and correct you, don't get upset, just continue the test. Optional: I will also ask you before and after the test about your perceived breathlessness and effort."*
- Standardised instructions should be provided:
  - After 45 seconds, tell the participant: *"15 seconds left until the test is over."*
- Do not verbally encourage the participant during the test

## Outcomes

- Number of repetitions
- Heart rate
- Oxygen saturation
- Subjective perception of breathlessness and effort
- STS Power Index (optional, see (42))

## References values

| Age group | Female      |      |      |      |        | Male        |      |      |      |        |
|-----------|-------------|------|------|------|--------|-------------|------|------|------|--------|
|           | Percentiles |      |      |      |        | Percentiles |      |      |      |        |
| Years     | p2.5%       | p25% | p50% | p75% | p97.5% | p2.5%       | p25% | p50% | p75% | p97.5% |
| 5-7       | 39          | 52   | 56   | 63   | 72     | 42          | 52   | 60   | 68   | 79     |
| 8-10      | 41          | 58   | 64   | 68   | 77     | 41          | 55   | 61   | 66   | 77     |
| 11-13     | 44          | 53   | 61   | 67   | 80     | 43          | 57   | 61   | 66   | 75     |
| 14-16     | 35          | 42   | 53   | 60   | 76     | 38          | 49   | 55   | 60   | 72     |
| ---       | ---         | ---  | ---  | ---  | ---    | ---         | ---  | ---  | ---  | ---    |
| 20-24     | 31          | 39   | 47   | 55   | 70     | 27          | 41   | 50   | 57   | 72     |
| 25-29     | 30          | 40   | 47   | 54   | 68     | 29          | 40   | 48   | 56   | 74     |
| 30-34     | 27          | 37   | 45   | 51   | 68     | 28          | 40   | 47   | 56   | 72     |
| 35-39     | 25          | 37   | 42   | 50   | 63     | 27          | 38   | 47   | 58   | 72     |
| 40-44     | 26          | 35   | 41   | 48   | 65     | 25          | 37   | 45   | 53   | 69     |
| 45-49     | 25          | 35   | 41   | 50   | 63     | 25          | 35   | 44   | 52   | 70     |
| 50-54     | 23          | 33   | 39   | 47   | 60     | 24          | 35   | 42   | 53   | 67     |
| 55-59     | 21          | 30   | 36   | 43   | 61     | 22          | 33   | 41   | 48   | 63     |
| 60-64     | 20          | 28   | 34   | 40   | 55     | 20          | 31   | 37   | 46   | 63     |
| 65-69     | 19          | 27   | 33   | 40   | 53     | 20          | 29   | 35   | 44   | 60     |
| 70-74     | 17          | 25   | 30   | 36   | 51     | 19          | 27   | 32   | 40   | 59     |
| 75-79     | 13          | 22   | 27   | 30   | 43     | 16          | 25   | 30   | 37   | 56     |

Note: Reference values for adults ( $n = 6,929$ , 20-79 years of age) are based on the publication by (62) ). Reference values for children and adolescents ( $n = 547$ , 5-16 years of age) are based on the publication by (63)).

## Learning effects

There is a substantial learning effect when the test is repeated (24, 41, 63, 64). It is important that the person to be tested performs at least on practice test to have an accurate assessment of

functional exercise capacity. If two tests are performed on the same day, consider a rest of about 30 minutes between the first and second test to allow for sufficient recovery.

### **Minimal important difference**

The minimal important difference, i.e., the smallest difference in 1-min STS that is perceived as beneficial by adults with CF is 5 repetitions. These data are based on a small study with 16 individuals with CF and should be confirmed by larger studies in the era of new modulator therapy. Data for children are not yet available.

### **Practical tips**

- Typically, the lowest SpO<sub>2</sub> value that the participant drops to (i.e. nadir value) is observed within the first minute of recovery (42, 65). We therefore suggest not to use SpO<sub>2</sub> recordings immediately post-exercise, i.e., wait until a stable signal is achieved and record the lowest SpO<sub>2</sub>.



**Test Report – 1-Minute Sit-to-Stand Test**

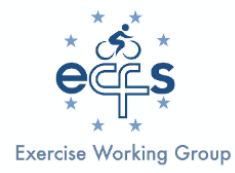

Date of test: \_\_\_\_\_ (dd/mm/yyyy)      Date of birth: \_\_\_\_\_ (dd/mm/yyyy)  
First name: \_\_\_\_\_      Last name: \_\_\_\_\_  
Indication of test: \_\_\_\_\_  
Oxygen supplementation:  Yes \_\_\_\_\_ (L)  No  
Chair height: \_\_\_\_\_ cm      Leg length (optional): \_\_\_\_\_ cm

**Test results**

Did the participant take a break during the test?  Yes \_\_\_\_\_ sec       No  
Did the participant experience an adverse event?       Yes  No  
Yes, please specify:  
\_\_\_\_\_  
\_\_\_\_\_

Number of STS repetitions: \_\_\_\_\_  
Reason for test termination: \_\_\_\_\_

**Pre-test**

**Post-test**

|                                                   |                                                         |
|---------------------------------------------------|---------------------------------------------------------|
| Resting heart rate: _____ bpm                     | Peak heart rate: _____ bpm                              |
| Resting SpO <sub>2</sub> : _____ %                | SpO <sub>2</sub> at peak exercise: _____ %              |
| Comment on SpO <sub>2</sub> signal quality: _____ |                                                         |
|                                                   | *Nadir SpO <sub>2</sub> : _____ %                       |
|                                                   | <i>*Based on continuous SpO<sub>2</sub> measurement</i> |
| Resting breathlessness: _____                     | Peak breathlessness: _____ [state scale used]           |
| Resting leg effort (RPE): _____                   | Peak leg effort: _____ [state scale used]               |

**Comments:**  
\_\_\_\_\_  
\_\_\_\_\_  
\_\_\_\_\_

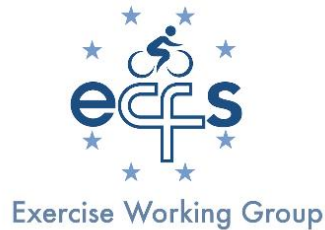

## TEST INSTRUCTIONS

### Quadriceps muscle strength testing

Quadriceps muscle strength testing involves measuring the maximal voluntary force produced by the knee extensors under isometric modality.

#### Equipment

- Medical chair with back rest allowing variable settings for inclination
- Seat belt fixed to the chair
- Strain gauge dynamometer (measurement range from 0 to, at least, 1,000 N)
- Inextensible ankle strap
- Amplifier and dedicated software for biomedical signal processing
- Computer (for visual feedback and storing the data)
- Tape measure for measuring the lever arm

#### Pre-test preparations

- Install the person on the chair and adjust the settings to have both knee and hip of the dominant leg at 90° angle flexion.
- Attach the leg to the force sensor ~1-2 cm above the malleoli of the ankle joint.
- Measure the distance between the knee joint center of rotation and the point of force application (lever arm).
- Secure the person to the chair with the seat belt placed across the waist.

#### Test instructions

- The aim of this test is to perform maximal voluntary contractions (MVC) of the knee extensors and determine the peak force.

- Provide instructions to the participant as follows:
 

*“The aim of this test is to measure the strength of your thigh. The movement is a leg extension against a fixed resistance. It is important to push as hard and fast as possible and to maintain your maximal effort during the whole procedure. Using a countdown, I will tell you the moment at which you have to push. I will encourage you during the entire duration of the contraction and then indicate when you can relax. You will repeat this procedure several times. During each trial, it is important that you keep your arm crossed on your abdomen. Remember that each trial requires a maximal effort. Do you have any questions? [...] We will begin with a short warm-up”.*
- Specific warm-up should include submaximal intermittent isometric contractions (e.g. 5 second contraction, 5 second relaxation) at increasing force levels (i.e. without exceeding ~ 40% of maximal perceived effort to avoid muscle fatigue) for ~ 3 minutes. This warm-up also allows the participant to be familiarised with the visual feedback they will receive during the test.
- Start with two initial MVC (not considered for analysis) permitting to familiarise the participant with maximal manoeuvres and check the stability of the measurement chain.
- Perform at least three attempts with the aim to obtain three reproducible MVC varying less than 5% (which is usually obtained in less than 6 trials) and keep the highest peak value among these three attempts for analysis.
- It is important for each MVC to obtain a force plateau of at least 3 seconds (see Figure 1).
- The total contraction time should range between 4-6 seconds.
- A 60 second recovery period should be observed between each trial.
- Vigorous encouragements are necessary, using the same frequency and intensity during each trial, using a repetition of single words like “go, go, go...” or “push, push, push...”

## **Outcomes**

- Maximal voluntary contraction, expressed in Newton (N) and Newton meters (Nm)

## Practical tips

- It is important to ensure that the appropriate posture is maintained by the participant throughout each attempt.
- Classic compensatory movements include movements of the arms and/or progressive rise of the buttocks from the chair. This usually results in increasing force level throughout the 4-6 second duration of the MVC (see Figure 1), so the participant should be informed that they must stay on the chair at all times.

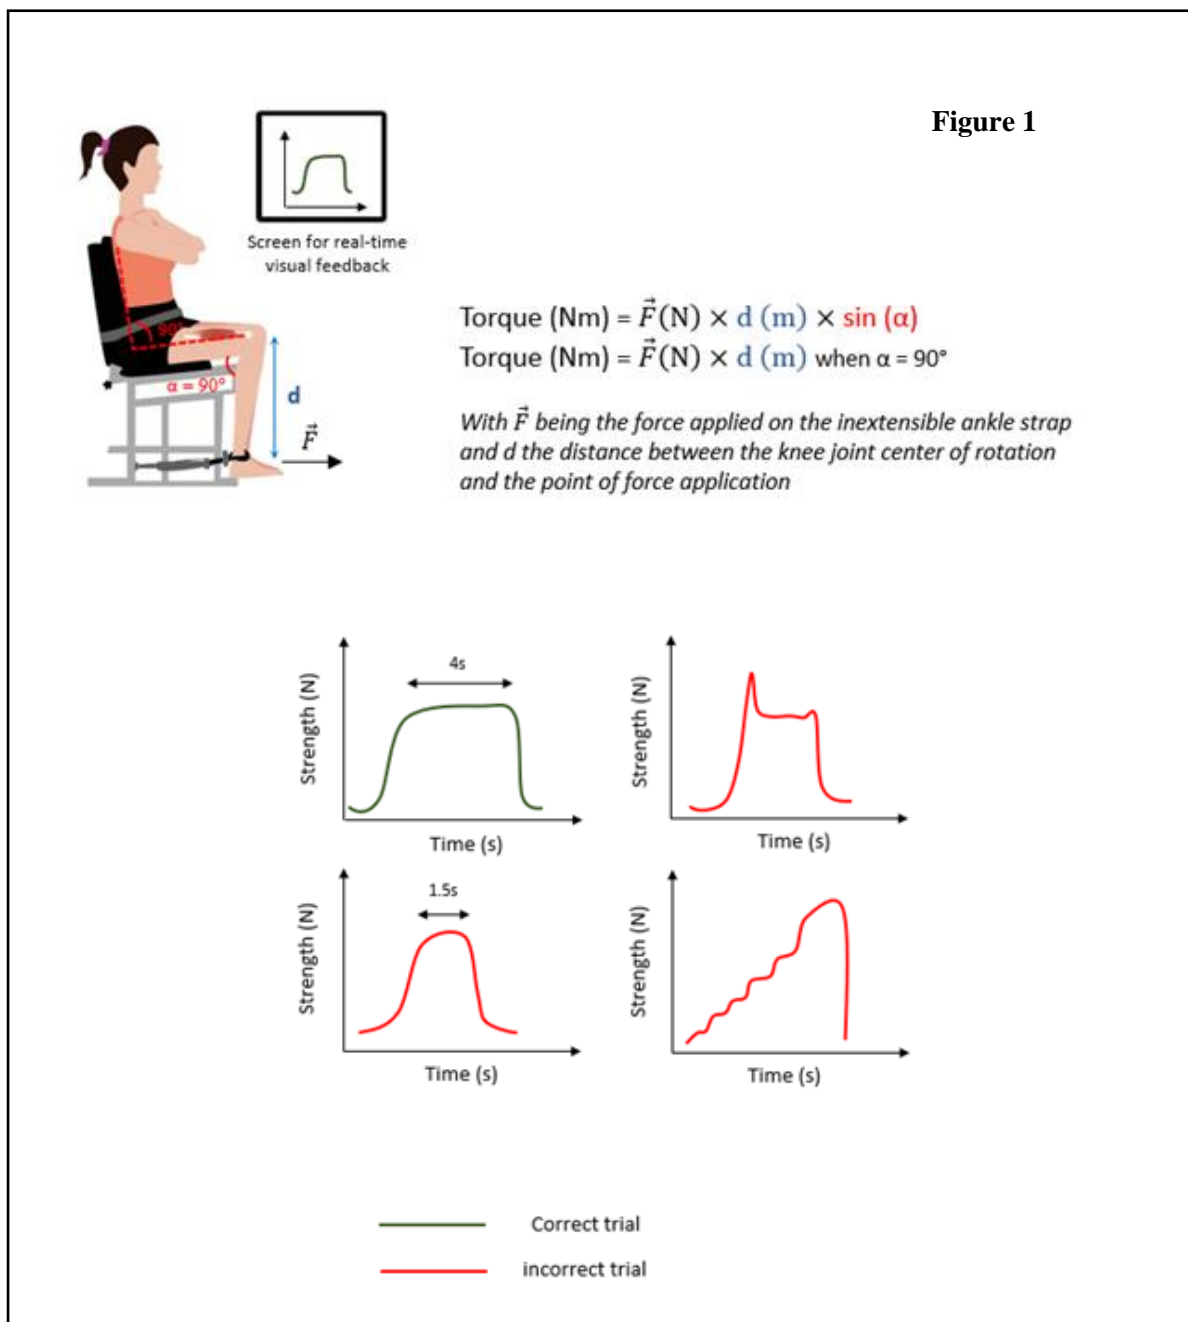

**Test Report – Quadriceps muscle strength testing**

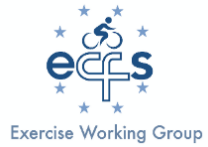

Date of test: \_\_\_\_\_ (dd/mm/yyyy)      Date of birth: \_\_\_\_\_ (dd/mm/yyyy)

First name: \_\_\_\_\_      Last name: \_\_\_\_\_

Indication of test: \_\_\_\_\_

Lever arm: \_\_\_\_\_ cm

**Test Results**

Did the participant experience an adverse event?       Yes       No

Yes, please specify:  
\_\_\_\_\_  
\_\_\_\_\_

Peak Force (N): \_\_\_\_\_      Peak Force (Nm): \_\_\_\_\_

**Comments**

\_\_\_\_\_  
\_\_\_\_\_  
\_\_\_\_\_  
\_\_\_\_\_

## ONLINE SUPPLEMENTARY MATERIAL (ECFS survey of Exercise Practitioners)

### Survey summary:

**Methods:** A group from the European CF Society Exercise Working Group (ECFS-EWG), including members from the Physiotherapy Specialist International Interest Group (PhySIG), aimed to develop guidance and standard operating procedures for an agreed selection of exercise tests, that allow for the comprehensive functional evaluation of people with CF. To facilitate test selection (considerations e.g. most-used, best-validated), an international panel ( $n=64$ ; 81.3% Europe), comprising physicians (5%), exercise scientists (14%), physiotherapists (78%), physiotherapy assistants and fitness instructors (3%), were consulted to obtain a snapshot of current practice versus the evidence base. Statements summarising our recommendations developed within this article were then presented to members of the wider ECFS-EWG at the January 2023 bi-annual meeting with agreement/disagreement obtained. Further stakeholder feedback on the test instructions and reporting templates was provided by physiotherapy experts from CFPhysio.com. A bias towards physiotherapists working with pwCF is noted.

**Table S1.** Participant demographics.

| Variable                                              | $n$ (%) = 64 (100.0)                                                                              |                                                                                                                  |
|-------------------------------------------------------|---------------------------------------------------------------------------------------------------|------------------------------------------------------------------------------------------------------------------|
| <b>Expert group</b>                                   | Physician ( $n = 3$ [4.7])<br>Exercise scientist / clinical exercise physiology ( $n = 9$ [14.1]) | Physiotherapist ( $n = 50$ [78.1])<br>Physiotherapy technician / assistant / fitness instructor ( $n = 2$ [3.1]) |
| <b>Geographical location</b>                          | Europe ( $n = 52$ [81.3])                                                                         | Outside of Europe ( $n = 12$ [18.8])                                                                             |
| <b>Experience working with people with CF (years)</b> | < 1 ( $n = 1$ [1.6])<br>3-5 ( $n = 7$ [10.9])                                                     | 1-3 ( $n = 3$ [4.7])<br>> 5 ( $n = 53$ [82.2])                                                                   |

Note: CF, cystic fibrosis

**Results:** In the last two years, 90.6% of respondents reported using exercise tests, the most common of which were the 6-minute walk test (6MWT; 79.4%), cycle ergometer cardiopulmonary exercise testing with gas analysis (CPET, 52.4%), the 1-minute sit-to-stand test (1minSTS; 39.7%), cycle ergometer tests without gas analysis (30.2%) and the 15-level 10-m modified shuttle test (28.6%). When asked to rank exercise tests (excluding the accepted gold standard CPET) based on perceptions of those most rigorously validated, the top 5 were: 1) cycle ergometer tests without gas analysis, 2) treadmill tests without gas analysis, 3) 6MWT, 4) 1minSTS and 5) the A-step test.

**Table S2.** Perceived usefulness of exercise tests available for use with people with cystic fibrosis.

| Exercise test                              | Used in clinical practice past 2 years<br><br>(n [%]) | Ranked usefulness of test |                 |                  |             |                  |                                                |
|--------------------------------------------|-------------------------------------------------------|---------------------------|-----------------|------------------|-------------|------------------|------------------------------------------------|
|                                            |                                                       | Not at all useful         | Slightly useful | Somewhat useful  | Very useful | Extremely useful | Not able to judge<br>(no experience with test) |
| CPET (with gas analysis) – cycle ergometer | 33 (52.4)                                             | 0                         | 1 (1.6)         | 3 (4.7)          | 10 (15.6)   | <b>34 (53.1)</b> | 16 (25.0)                                      |
| CPET (with gas analysis) – treadmill       | 10 (15.9)                                             | 0                         | 0               | 2 (3.1)          | 9 (14.1)    | 20 (31.3)        | <b>33 (51.6)</b>                               |
| Cycle ergometer test without gas analysis  | 19 (30.2)                                             | 0                         | 2 (3.1)         | 10 (15.6)        | 21 (32.8)   | 2 (3.1)          | <b>29 (45.3)</b>                               |
| Treadmill test without gas analysis        | 14 (22.2)                                             | 0                         | 1 (1.6)         | 13 (20.3)        | 14 (21.9)   | 1 (1.6)          | <b>35 (54.7)</b>                               |
| 1-minute sit-to-stand test                 | 25 (39.7)                                             | 3 (4.7)                   | 6 (9.4)         | 19 (29.7)        | 12 (18.8)   | 3 (4.7)          | <b>21 (32.8)</b>                               |
| Modified shuttle test 15-level (10 m)      | 18 (28.6)                                             | 2 (3.1)                   | 2 (3.1)         | 24 (37.5)        | 6 (9.4)     | 3 (4.7)          | <b>27 (42.2)</b>                               |
| Modified shuttle test 25-level (10 m)      | 12 (19.0)                                             | 2 (3.1)                   | 2 (3.1)         | 13 (20.3)        | 10 (15.6)   | 3 (4.7)          | <b>34 (53.1)</b>                               |
| 20 m shuttle test                          | 1 (1.6)                                               | 2 (3.1)                   | 1 (1.6)         | 9 (14.1)         | 4 (6.3)     | 1 (1.6)          | <b>47 (73.4)</b>                               |
| 6-minute walk test                         | 50 (79.4)                                             | 2 (3.1)                   | 7 (10.9)        | <b>22 (34.4)</b> | 19 (29.7)   | 7 (10.9)         | 7 (10.9)                                       |
| 12-minute walk test                        | 0 (0.0)                                               | 3 (4.7)                   | 1 (1.6)         | 4 (6.3)          | 5 (7.8)     | 0                | <b>51 (79.7)</b>                               |
| 3-minute step test                         | 11 (17.5)                                             | 4 (6.3)                   | 4 (6.3)         | 10 (15.6)        | 9 (14.1)    | 2 (3.1)          | <b>35 (54.7)</b>                               |
| Alfred step test (A-step)                  | 5 (7.9)                                               | 3 (4.7)                   | 1 (1.6)         | 3 (4.7)          | 4 (6.3)     | 4 (6.3)          | <b>49 (76.6)</b>                               |
| Handgrip strength test                     | 17 (27.0)                                             | 1 (1.6)                   | 7 (10.9)        | 12 (18.8)        | 7 (10.9)    | 2 (3.1)          | <b>35 (54.7)</b>                               |
| Quadriceps strength test                   | 6 (9.5)                                               | 1 (1.6)                   | 1 (1.6)         | 8 (12.5)         | 8 (12.5)    | 3 (4.7)          | <b>43 (67.2)</b>                               |
| Other                                      | 11 (17.5)                                             | -                         | -               | -                | -           | -                | -                                              |

Note: CPET, cardiopulmonary exercise testing. Data are presented as n (%).

**Table S3.** Groups for whom exercise testing can be used in clinical practice.

| Exercise test                              | Group     |           |                   |                       |                     |                   |                                                |
|--------------------------------------------|-----------|-----------|-------------------|-----------------------|---------------------|-------------------|------------------------------------------------|
|                                            | Children  | Adults    | Mild lung disease | Moderate lung disease | Severe lung disease | All groups listed | Not able to judge<br>(no experience with test) |
| CPET (with gas analysis) – cycle ergometer | 20 (31.3) | 23 (35.9) | 20 (31.3)         | 19 (29.7)             | 10 (15.6)           | 29 (45.3)         | 15 (23.4)                                      |
| CPET (with gas analysis) – treadmill       | 12 (18.8) | 17 (26.6) | 12 (18.8)         | 15 (23.4)             | 4 (6.3)             | 13 (20.3)         | 33 (51.6)                                      |
| Cycle ergometer test without gas analysis  | 11 (17.2) | 13 (20.3) | 10 (15.6)         | 11 (17.2)             | 4 (6.3)             | 24 (37.5)         | 26 (40.6)                                      |
| Treadmill test without gas analysis        | 12 (18.8) | 15 (23.4) | 11 (17.2)         | 12 (18.8)             | 1 (1.6)             | 17 (26.6)         | 30 (46.9)                                      |
| 1-minute sit-to-stand test                 | 14 (21.9) | 26 (40.6) | 9 (14.1)          | 18 (28.1)             | 27 (42.2)           | 13 (20.3)         | 22 (34.4)                                      |
| Modified shuttle test 15-level (10 m)      | 23 (35.9) | 25 (39.1) | 15 (23.4)         | 23 (35.9)             | 13 (20.3)           | 11 (17.2)         | 27 (42.2)                                      |
| Modified shuttle test 25-level (10 m)      | 22 (34.4) | 23 (35.9) | 19 (29.7)         | 17 (26.6)             | 5 (7.8)             | 8 (12.5)          | 31 (48.4)                                      |
| 20 m shuttle test                          | 10 (15.6) | 13 (20.3) | 10 (15.6)         | 9 (14.1)              | 1 (1.6)             | 7 (10.9)          | 44 (68.8)                                      |
| 6-minute walk test                         | 18 (28.1) | 30 (46.9) | 6 (9.4)           | 16 (25.0)             | 35 (54.7)           | 14 (21.9)         | 8 (12.5)                                       |
| 12-minute walk test                        | 6 (9.4)   | 10 (15.6) | 7 (10.9)          | 9 (14.1)              | 4 (6.3)             | 1 (1.6)           | 48 (75.0)                                      |
| 3-minute step test                         | 12 (18.8) | 19 (29.7) | 11 (17.2)         | 17 (26.6)             | 11 (17.2)           | 5 (7.8)           | 33 (51.6)                                      |
| Alfred step test (A-step)                  | 5 (7.8)   | 8 (12.5)  | 6 (9.4)           | 6 (9.4)               | 4 (6.3)             | 5 (7.8)           | 49 (76.6)                                      |
| Handgrip strength test                     | 7 (10.9)  | 15 (23.4) | 14 (21.9)         | 13 (20.3)             | 15 (23.4)           | 14 (21.9)         | 34 (53.1)                                      |
| Quadriiceps strength test                  | 7 (10.9)  | 10 (15.6) | 9 (14.1)          | 9 (14.1)              | 10 (15.6)           | 11 (17.2)         | 42 (65.6)                                      |

Note: CPET, cardiopulmonary exercise testing. Data are presented as *n* (%).



**Table S4.** Perception of clinimetric properties of exercise tests available for use with people with cystic fibrosis.

| Exercise test                              | Perception |         |            |           |           |                                                      |
|--------------------------------------------|------------|---------|------------|-----------|-----------|------------------------------------------------------|
|                                            | Very poor  | Poor    | Acceptable | Good      | Very good | Not able to judge ( <i>no experience with test</i> ) |
| CPET (with gas analysis) – cycle ergometer | 0          | 0       | 0          | 5 (7.8)   | 45 (70.3) | 14 (21.9)                                            |
| CPET (with gas analysis) – treadmill       | 0          | 0       | 0          | 7 (10.9)  | 28 (43.8) | 29 (45.3)                                            |
| Cycle ergometer test without gas analysis  | 0          | 2 (3.1) | 9 (14.1)   | 16 (25.0) | 11 (17.2) | 26 (40.6)                                            |
| Treadmill test without gas analysis        | 0          | 2 (3.1) | 10 (15.6)  | 17 (26.6) | 6 (9.4)   | 29 (45.3)                                            |
| 1-minute sit-to-stand test                 | 0          | 2 (3.1) | 23 (35.9)  | 14 (21.9) | 2 (3.1)   | 23 (35.9)                                            |
| Modified shuttle test 15-level (10 m)      | 0          | 1 (1.6) | 16 (25.0)  | 16 (25.0) | 4 (6.3)   | 27 (42.2)                                            |
| Modified shuttle test 25-level (10 m)      | 0          | 2 (3.1) | 15 (23.4)  | 10 (15.6) | 5 (7.8)   | 32 (50.0)                                            |
| 20 m shuttle test                          | 0          | 3 (4.7) | 8 (12.5)   | 4 (6.3)   | 2 (3.1)   | 47 (73.4)                                            |
| 6-minute walk test                         | 1 (1.6)    | 4 (6.3) | 25 (39.1)  | 15 (23.4) | 10 (15.6) | 9 (14.1)                                             |
| 12-minute walk test                        | 1 (1.6)    | 3 (4.7) | 5 (7.8)    | 6 (9.4)   | 2 (3.1)   | 47 (73.4)                                            |
| 3-minute step test                         | 2 (3.1)    | 5 (7.8) | 10 (15.6)  | 9 (14.1)  | 5 (7.8)   | 33 (51.6)                                            |
| Alfred step test (A-step)                  | 1 (1.6)    | 4 (6.3) | 1 (1.6)    | 8 (12.5)  | 2 (3.1)   | 48 (75.0)                                            |
| Handgrip strength test                     | 0          | 2 (3.1) | 11 (17.2)  | 10 (15.6) | 6 (9.4)   | 35 (54.7)                                            |
| Quadriceps strength test                   | 0          | 2 (3.1) | 9 (14.1)   | 5 (7.8)   | 4 (6.3)   | 44 (68.8)                                            |

Note: CPET, cardiopulmonary exercise testing. Data are presented as *n* (%).

**Table S5.** Perceived rankings of the validation of exercise tests available for use in people with cystic fibrosis.

| Exercise test                             | Rank             |                |                  |                  |               |
|-------------------------------------------|------------------|----------------|------------------|------------------|---------------|
|                                           | 1                | 2              | 3                | 4                | 5             |
| Cycle ergometer test without gas analysis | <b>33 (62.3)</b> | 9 (17)         | 3 (5.7)          | 3 (5.7)          | 5 (9.4)       |
| Treadmill test without gas analysis       | 10 (25)          | <b>16 (40)</b> | 5 (12.5)         | 4 (10)           | 5 (12.5)      |
| 1-minute sit-to-stand test                | 2 (5.3)          | 6 (15.8)       | 11 (28.9)        | <b>15 (39.5)</b> | 4 (10.5)      |
| Modified shuttle test 15-level (10 m)     | 3 (7.5)          | <b>12 (30)</b> | 9 (22.5)         | 10 (25)          | 6 (15)        |
| Modified shuttle test 25-level (10 m)     | 7 (18.9)         | 10 (27)        | 9 (24.3)         | 4 (10.8)         | 7 (18.9)      |
| 20 m shuttle test                         | 1 (7.1)          | 2 (14.3)       | 8 (57.1)         | 2 (14.3)         | 1 (7.1)       |
| 6-minute walk test                        | 9 (16.1)         | 14 (25)        | <b>16 (28.6)</b> | 9 (16.1)         | 8 (14.3)      |
| 12-minute walk test                       | 1 (7.1)          | 2 (14.3)       | 4 (28.6)         | 5 (35.7)         | 2 (14.3)      |
| 3-minute step test                        | 0                | 3 (12.5)       | 11 (45.8)        | 8 (33.3)         | 2 (8.3)       |
| Alfred step test (A-step)                 | 1 (4)            | 3 (12)         | 9 (36)           | 3 (12)           | <b>9 (36)</b> |
| Handgrip strength test                    | 0                | 5 (20)         | 7 (28)           | 7 (28)           | 6 (24)        |
| Quadriceps strength test                  | 2 (10)           | 4 (20)         | 7 (35)           | 5 (25)           | 2 (10)        |

Note: CPET, cardiopulmonary exercise testing. Data are presented as *n* (%).

Other tests currently being used in clinical practice included:

- Canadian Agility and Movement Scale Assessment
- Submaximal tests, Wingate testing
- ½ Bruce treadmill test
- Inpatient exercise testing (1-15-minute walking test) for adults with CF at a comfortable pace for the individual, for as long as they can as comfortably continue, possibly depending on how unwell they are during an acute exacerbation following admission to hospital. The aim of this informal home-grown test is to determine whether they desaturate during walking and require oxygen therapy.
- Biodex isokinetic strength testing

Consensus agreement was sought from members of the ECFS Exercise Working Group at the January meeting. Members were asked to comment if they did not agree with the summary statements presented in this paper or to rate their agreement on a Likert scale from 1-5. The mean response to all statements presented was 4/5.

## REFERENCES

1. Hebestreit H, Arets HG, Aurora P, Boas S, Cerny F, Hulzebos EH, et al. Statement on exercise testing in cystic fibrosis. *Respiration*. 2015;90(4):332-51.
2. Nixon PA, Orenstein DM, Kelsey SF, Doershuk CF. The prognostic value of exercise testing in patients with cystic fibrosis. *New England Journal of Medicine*. 1992;327(25):1785-8.
3. Hebestreit H, Hulzebos EH, Schneiderman JE, Karila C, Boas SR, Kriemler S, et al. Cardiopulmonary exercise testing provides additional prognostic information in cystic fibrosis. *American journal of respiratory and critical care medicine*. 2019;199(8):987-95.
4. Hebestreit H, Schmid K, Kieser S, Junge S, Ballmann M, Roth K, et al. Quality of life is associated with physical activity and fitness in cystic fibrosis. *BMC pulmonary medicine*. 2014;14(1):26.
5. Saynor ZL, Barker AR, Oades PJ, Williams CA. Reproducibility of maximal cardiopulmonary exercise testing for young cystic fibrosis patients. *Journal of Cystic Fibrosis*. 2013;12(6):644-50.
6. Marciniuk DD, Watts R, Gallagher CG. Reproducibility of incremental maximal cycle ergometer testing in patients with restrictive lung disease. *Thorax*. 1993;48(9):894-8.
7. Sawyer A, Cavalheri V, Jenkins S, Wood J, Cecins N, Bear N, et al. High-intensity interval training is effective at increasing exercise endurance capacity and is well tolerated by adults with cystic fibrosis. *Journal of clinical medicine*. 2020;9(10):3098.
8. Hebestreit H, Kriemler S, Schindler C, Stein L, Karila C, Urquhart DS, et al. Effects of a partially supervised conditioning program in cystic fibrosis: an international multicenter, randomized controlled trial (ACTIVATE-CF). *American Journal of Respiratory and Critical Care Medicine*. 2022;205(3):330-9.
9. Holland AE, Spruit, M.A., Troosters, T., Puhan, M.A., Pepin, V., Saey, D., McCormack, M.C., Carlin, B.W., Sciruba, F.C., Pitta, F. and Wanger, J. An official European Respiratory Society/American Thoracic Society technical standard: field walking tests in chronic respiratory disease. *European Respiratory Journal*. 2014;44:1428-46.
10. Lang RL, Stockton, K., Wilson, C., Russell, T.G. and Johnston, L.M. Exercise testing for children with cystic fibrosis: A systematic review. *Pediatric Pulmonology*. 2020;55(8):1996-2010.
11. Gulmans V, Van Veldhoven N, De Meer K, Helders P. The six-minute walking test in children with cystic fibrosis: reliability and validity. *Pediatric pulmonology*. 1996;22(2):85-9.
12. Martin C, Chapron J, Hubert D, Kanaan R, Honoré I, Paillasseur J-L, et al. Prognostic value of six minute walk test in cystic fibrosis adults. *Respiratory medicine*. 2013;107(12):1881-7.
13. Combret Y, Medrinal, C., Bonnevie, T., Gravier, F.E., Le Roux, P., Lamia, B., Prieur, G. and Reychler, G. Clinimetric evaluation of muscle function tests for individuals with cystic fibrosis. *Journal of Cystic Fibrosis*. 2020.
14. Balfour-Lynn IM, Prasad SA, Laverty A, Whitehead BF, Dinwiddie R. A step in the right direction: assessing exercise tolerance in cystic fibrosis. *Pediatric pulmonology*. 1998;25(4):278-84.
15. Pereira FM, Ribeiro MÂGdO, Ribeiro AF, Toro AADC, Hessel G, Ribeiro JD. Functional performance on the six-minute walk test in patients with cystic fibrosis. *Jornal brasileiro de pneumologia*. 2011;37(6):735-44.
16. Mandrusiak A, Maurer C, MacDonald J, Wilson C, Watter P. Functional capacity tests in young people with cystic fibrosis. *New Zealand journal of physiotherapy*. 2009;37(1):13-6.
17. Cunha MT, Rozov T, de Oliveira RC, Jardim JR. Six-minute walk test in children and adolescents with cystic fibrosis. *Pediatric pulmonology*. 2006;41(7):618-22.
18. Ziegler B, Rovedder PME, Oliveira CL, e Silva FdA, Dalcin PdTR. Repeatability of the 6-minute walk test in adolescents and adults with cystic fibrosis. *Respiratory care*. 2010;55(8):1020-5.
19. López-de-Uralde-Villanueva I, Sarría Visa T, Moscardó Marichalar P, Del Corral T. Minimal detectable change in six-minute walk test in children and adolescents with cystic fibrosis. *Disability and rehabilitation*. 2019:1-6.
20. Radtke T, Faro, A., Wong, J., Boehler, A. and Benden, C. Exercise testing in pediatric lung transplant candidates with cystic fibrosis. *Pediatric transplantation*. 2011;15(3):294-9.

21. Donadio MV, Heinzmann-Filho JP, Vendrusculo FM, Frasson PX, Marostica PJ. Six-minute walk test results predict risk of hospitalization for youths with cystic fibrosis: a 5-year follow-up study. *The Journal of pediatrics*. 2017;182:204-9. e1.
22. Kadikar A, Maurer J, Kesten S. The six-minute walk test: a guide to assessment for lung transplantation. *The Journal of heart and lung transplantation: the official publication of the International Society for Heart Transplantation*. 1997;16(3):313-9.
23. Ramos KJ, Smith PJ, McKone EF, Pilewski JM, Lucy A, Hempstead SE, et al. Lung transplant referral for individuals with cystic fibrosis: Cystic Fibrosis Foundation consensus guidelines. *Journal of Cystic Fibrosis*. 2019;18(3):321-33.
24. Combret Y, Boujibar F, Gennari C, Medrinal C, Sicinski S, Bonnevie T, et al. Measurement properties of the one-minute sit-to-stand test in children and adolescents with cystic fibrosis: A multicenter randomized cross-over trial. *Plos one*. 2021;16(2):e0246781.
25. Lang RL, Stockton K, Wilson C, Russell TG, Johnston LM. Exercise testing for children with cystic fibrosis: A systematic review. *Pediatric Pulmonology*. 2020;55(8):1996-2010.
26. Moorcroft A, Dodd M, Webb A. Exercise testing and prognosis in adult cystic fibrosis. *Thorax*. 1997;52(3):291-3.
27. Singh SJ, Morgan M, Scott S, Walters D, Hardman AE. Development of a shuttle walking test of disability in patients with chronic airways obstruction. *Thorax*. 1992;47(12):1019-24.
28. Vendrusculo FM, Heinzmann-Filho JP, Campos NE, Gheller MF, de Almeida IS, Donadio MV. Prediction of peak oxygen uptake using the modified shuttle test in children and adolescents with cystic fibrosis. *Pediatric pulmonology*. 2019.
29. Bradley J, Howard J, Wallace E, Elborn S. Validity of a modified shuttle test in adult cystic fibrosis. *Thorax*. 1999;54(5):437-9.
30. Donadio MVF, Vendrusculo FM, Campos NE, Becker NA, de Almeida IS, Queiroz KCV, et al. The modified shuttle test as a predictor of risk for hospitalization in youths with cystic fibrosis: A two-year follow-up study: Modified shuttle test as a predictor of hospitalization. *Journal of Cystic Fibrosis*. 2021.
31. Leite LR, Queiroz KCV, da Silva FH, Coelho CC, Donadio MVF, Aquino EdS. Clinical use of the modified shuttle test in children with cystic fibrosis: Is one test sufficient? *Pediatric Pulmonology*. 2021;56(6):1550-7.
32. Singh SJ, Puhan MA, Andrianopoulos V, Hernandez NA, Mitchell KE, Hill CJ, et al. An official systematic review of the European Respiratory Society/American Thoracic Society: measurement properties of field walking tests in chronic respiratory disease. *Eur Respiratory Soc*; 2014.
33. Bradley J, Howard J, Wallace E, Elborn S. Reliability, repeatability, and sensitivity of the modified shuttle test in adult cystic fibrosis. *Chest*. 2000;117(6):1666-71.
34. Del Corral T, Sánchez ÁG, López-de-Uralde-Villanueva I. Test-retest reliability, minimal detectable change and minimal clinically important differences in modified shuttle walk test in children and adolescents with cystic fibrosis. *Journal of Cystic Fibrosis*. 2020;19(3):442-8.
35. Corda J, Holland AE, Du Berry C, Westrupp N, Cox NS. Validation of the 25 level modified shuttle test in children with cystic fibrosis. *Pediatric Pulmonology*. 2023. Epub 2023 May 5.
36. Cox NS, Follett J, McKay KO. Modified shuttle test performance in hospitalized children and adolescents with cystic fibrosis. *Journal of Cystic Fibrosis*. 2006;5(3):165-70.
37. Paranjape SM, Barnes LA, Carson KA, von Berg K, Loosen H, Mogayzel Jr PJ. Exercise improves lung function and habitual activity in children with cystic fibrosis. *Journal of Cystic Fibrosis*. 2012;11(1):18-23.
38. del Corral T, Iranzo M, Lopez-de-Uralde-Villanueva I, Martinez-Alejos R, Blanco I, Vilaro J. Effectiveness of a home-based active video game programme in young cystic fibrosis patients. *Respiration*. 2018;95(2):87-97.
39. Cox NS, Eldridge B, Rawlings S, Dreger J, Corda J, Hauser J, et al. Web-based physical activity promotion in young people with CF: a randomised controlled trial. *thorax*. 2023;78(1):16-23.
40. Elkins M, Dentice R, Bye P. Validation of the MST-25: an extension of the modified shuttle test (MST). *Journal of Cystic Fibrosis*. 2009;8:S70.
41. Radtke T, Puhan MA, Hebestreit H, Kriemler S. The 1-min sit-to-stand test—A simple functional capacity test in cystic fibrosis? *Journal of Cystic Fibrosis*. 2016;15(2):223-6.

42. Radtke T, Hebestreit H, Puhan MA, Kriemler S. The 1-min sit-to-stand test in cystic fibrosis—Insights into cardiorespiratory responses. *Journal of Cystic Fibrosis*. 2017;16(6):744-51.
43. Gruet M, Peyré-Tartaruga LA, Mely L, Vallier J-M. The 1-minute sit-to-stand test in adults with cystic fibrosis: correlations with cardiopulmonary exercise test, 6-minute walk test, and quadriceps strength. *Respiratory Care*. 2016;61(12):1620-8.
44. Kohlbrenner D, Benden, C. and Radtke, T. The 1-Minute Sit-to-Stand Test in Lung Transplant Candidates: An Alternative to the 6-Minute Walk Test. . *Respiratory Care*. 2020;65(4):437-43.
45. Troosters T, Langer, D., Vrijssen, B., Segers, J., Wouters, K., Janssens, W., Gosselink, R., Decramer, M. and Dupont, L. Skeletal muscle weakness, exercise tolerance and physical activity in adults with cystic fibrosis. *European Respiratory Journal*. 2009;33(1):99-106.
46. Gruet M, Vallier J, Mely L, Brisswalter J. Long term reliability of EMG measurements in adults with cystic fibrosis. *Journal of Electromyography and Kinesiology*. 2010;20(2):305-12.
47. Selvadurai HC, Blimkie C, Meyers N, Mellis C, Cooper P, Van Asperen P. Randomized controlled study of in-hospital exercise training programs in children with cystic fibrosis. *Pediatric pulmonology*. 2002;33(3):194-200.
48. Adair D, Hider A, Filbrun AG, Tapley C, Bouma S, Iwanicki C, et al. Assessing the Utility of an Outpatient Exercise Program for Children With Cystic Fibrosis: A Quality Improvement Project. *Frontiers in Pediatrics*. 2022;9:1545.
49. Radtke T, Crook S, Kaltsakas G, Louvaris Z, Berton D, Urquhart DS, et al. ERS statement on standardisation of cardiopulmonary exercise testing in chronic lung diseases. *European respiratory review*. 2019;28(154).
50. Hulzebos H, Werkman M, van Brussel M, Takken T. Towards an individualized protocol for workload increments in cardiopulmonary exercise testing in children and adolescents with cystic fibrosis. *Journal of Cystic Fibrosis*. 2012;11(6):550-4.
51. Takken T, Mylius C, Paap D, Broeders W, Hulzebos H, Van Brussel M, et al. Reference values for cardiopulmonary exercise testing in healthy subjects—an updated systematic review. *Expert review of cardiovascular therapy*. 2019;17(6):413-26.
52. Blanchard J, Blais S, Chetaille P, Bisson M, Counil FP, Huard-Girard T, et al. New reference values for cardiopulmonary exercise testing in children. *Medicine and science in sports and exercise*. 2018;50(6):1125.
53. Bongers BC, Hulzebos EH, Van Brussel M, Takken T. *Pediatric norms for cardiopulmonary exercise testing*. Uitgeverij BOXPress, 's-Herogenbosch, The Netherlands. 2014.
54. Holland AE, Spruit MA, Troosters T, Puhan MA, Pepin V, Saey D, et al. An official European Respiratory Society/American Thoracic Society technical standard: field walking tests in chronic respiratory disease. *European Respiratory Journal*. 2014;44(6):1428-46.
55. Hernandez NA, Wouters E, Meijer K, Annegarn J, Pitta F, Spruit M. Reproducibility of 6-minute walking test in patients with COPD. *European Respiratory Journal*. 2011;38(2):261-7.
56. ATS. ATS statement: guidelines for the six-minute walk test. *Am J Respir Crit Care Med*. 2002;166(1):111-7.
57. Dyer F, Marriner P, Cheema K, Bott J. Is a practice incremental shuttle walk test really necessary? *Chronic Respiratory Disease*. 2011;8(3):201-5.
58. McKeough ZJ, Leung RW, Alison JA. Shuttle walk tests as outcome measures: Are two incremental shuttle walk tests and two endurance shuttle walk tests necessary? *American journal of physical medicine & rehabilitation*. 2011;90(1):35-9.
59. Selvadurai HC, Cooper PJ, Meyers N, Blimkie CJ, Smith L, Mellis CM, et al. Validation of shuttle tests in children with cystic fibrosis. *Pediatric pulmonology*. 2003;35(2):133-8.
60. Probst VS, Hernandez NA, Teixeira DC, Felcar JM, Mesquita RB, Gonçalves CG, et al. Reference values for the incremental shuttle walking test. *Respiratory medicine*. 2012;106(2):243-8.
61. de Cordoba Lanza F, do Prado Zagatto E, Silva JC, Selman JPR, Imperatori TBG, Zanatta DJM, et al. Reference equation for the incremental shuttle walk test in children and adolescents. *The Journal of pediatrics*. 2015;167(5):1057-61.
62. Strassmann A, Steurer-Stey C, Dalla Lana K, Zoller M, Turk AJ, Suter P, et al. Population-based reference values for the 1-min sit-to-stand test. *International journal of public health*. 2013;58(6):949-53.

63. Haile SR, Fühner T, Granacher U, Stocker J, Radtke T, Kriemler S. Reference values and validation of the 1-min sit-to-stand test in healthy 5-to 16-year-old youth. medRxiv. 2021.
64. Reychler G, Pincin L, Audag N, Poncin W, Caty G. One-minute sit-to-stand test as an alternative tool to assess the quadriceps muscle strength in children. *Respiratory Medicine and Research*. 2020;78:100777.
65. Crook S, Büsching G, Schultz K, Lehbert N, Jelusic D, Keusch S, et al. A multicentre validation of the 1-min sit-to-stand test in patients with COPD. *European Respiratory Journal*. 2017;49(3).
